# Supplementary material for: Amorphous FeNi-bimetallic infinite coordination polymers as advanced electrocatalysts for the oxygen evolution reaction
Source: Royal Society of Chemistry journal article supplement (doi:10.1039/c9cc06109f), 2019-01-01
Supplement: c9cc06109f1.pdf [file c9cc06109f1.pdf]

# Amorphous FeNi-bimetallic Infinite Coordination Polymers as Advanced Electrocatalysts for the Oxygen Evolution Reaction

Junchao Ma,<sup>a</sup> Xiaojue Bai,<sup>a</sup> Wenxiu He,<sup>a</sup> Sha Wang,<sup>a</sup> Linlin Li,<sup>a</sup> Huan Chen,<sup>a</sup>  
Tieqiang Wang,<sup>a</sup> Xuemin Zhang,<sup>a</sup> Yunong Li,<sup>a</sup> Liying Zhang,<sup>a</sup> Junyi Chen,<sup>b</sup> Fanbao  
Meng\*<sup>a</sup> and Yu Fu\*<sup>a</sup>

<sup>a</sup> Department of Chemistry, College of Sciences, Northeastern University, Shenyang  
110819, P. R. China.

<sup>b</sup> Engineering Laboratory of Chemical Resources Utilization in South Xinjiang of  
Xinjiang Production and Construction Corps, College of Life Science, Tarim  
University, Xinjiang Uygur Autonomous Region, Alaer, 843300, P. R. China.

## Corresponding Author

\* E-mail: fuyu@mail.neu.edu.cn (Yu Fu)

\* E-mail: mengfb@mail.neu.edu.cn (Fanbao Meng)

## Experimental Section

### Materials

All chemicals used in this work were analytical grade and without further purification. 2-aminoterephthalic acid ( $\text{H}_2\text{BDC-NH}_2$ ), 1,4-benzenedicarboxylate ( $\text{H}_2\text{BDC}$ ), 1,4-naphthalenedicarboxylic acid ( $\text{H}_2(1,4\text{-NDC})$ ), 2,6-naphthalenedicarboxylic acid ( $\text{H}_2(2,6\text{-NDC})$ ), 2,5-dihydroxyterephthalic acid ( $\text{H}_2\text{DOBDC}$ ), trimesic acid ( $\text{H}_3\text{BTC}$ ) were purchased from Energy Chemical. Iron chloride tetrahydrate ( $\text{FeCl}_2 \cdot 4\text{H}_2\text{O}$ ) were purchased from Tianjin bailunsi biotechnology Co. Ltd. Nickel (II) acetate tetrahydrate [ $(\text{CH}_3\text{COO})_2\text{Ni} \cdot 4\text{H}_2\text{O}$ ], ethanol ( $\text{C}_2\text{H}_5\text{OH}$ ), acetonitrile ( $\text{CH}_3\text{CN}$ ) and N,N-dimethylformamide (DMF) were purchased from Sinopharm Chemical Reagent Co. Ltd.

### Synthesis of bimetallic $\text{Fe}_x\text{Ni}_y(\text{BDC-NH}_2)$ ICPs

Take the synthesis of  $\text{Fe}_1\text{Ni}_2(\text{BDC-NH}_2)$  ICP as a typical example. 0.09 mmol of  $\text{FeCl}_2 \cdot 4\text{H}_2\text{O}$  (17.9 mg) and 0.18 mmol of  $(\text{CH}_3\text{COO})_2\text{Ni} \cdot 4\text{H}_2\text{O}$  (44.8 mg) were dissolved in a 30 mL mixture of DMF and  $\text{CH}_3\text{CN}$  (V:V=1:2) as the metal precursor solution. The organic ligand solution was dissolving 0.39 mmol of  $\text{H}_2\text{BDC-NH}_2$  (70.6 mg) into the mixture of 20 ml of DMF and 10 ml of  $\text{CH}_3\text{CN}$ . Then the metal precursor solution was directly added into linker solution under magnetic stirring 1 h at room temperature. As time goes by, the deep yellow precipitation was gradually increasing. Finally, the product was centrifuged and washed with DMF three times to obtain  $\text{Fe}_1\text{Ni}_2(\text{BDC-NH}_2)$  ICP. The synthesis of the  $\text{Fe}_x\text{Ni}_y(\text{BDC-NH}_2)$  ICPs with diverse metallic ratios only need to adjust the ions concentrations of  $\text{FeCl}_2 \cdot 4\text{H}_2\text{O}$  and

$(\text{CH}_3\text{COO})_2\text{Ni} \cdot 4\text{H}_2\text{O}$ . At the same time, the preparation method and all ions concentrations of other FeNi-bimetallic ICPs with different ligands were consistent with the above method.

### **Preparation of catalytic electrodes**

The products were uniformly dispersed into 5 ml ethanol. Ni foam substrates were impregnated directly into the teflon cap of containing 2.2 ml samples. Then put them in the air and make the solvent volatilize completely at the room temperature.

### **Characterization**

The morphology of  $\text{Fe}_1\text{Ni}_2(\text{BDC-NH}_2)$  ICP was characterized with a field emission scanning electron microscope (FE-SEM, Hitachi SU8010) and corresponding elemental mapping images were captured on energy-dispersive X-ray (EDX, Oxford Instruments). The crystal structure of the product was tested by X-ray diffraction (XRD) on PANalytical Empyrean X-ray diffractometer in the  $2\theta$  range of  $5-40^\circ$  with  $\text{Cu K}\alpha 1$  ( $\lambda = 1.5406 \text{ \AA}$ ) radiation. The X-ray photoelectron spectroscopy (XPS) measurements were carried out on Thermo Scientific ESCALAB 250 apparatus to affirm elemental valence states of the electrocatalyst. The organic groups and specific surface areas/pore sizes of the samples were characterized by fourier transform infrared spectroscopy (FT-IR, Bruker VERTEX 70) and nitrogen adsorption-desorption isotherms at 77 K (Micromeritics ASAP 2020 system). The actual ratio of Fe and Ni content in the  $\text{Fe}_1\text{Ni}_2(\text{BDC-NH}_2)$  was measured by the inductively coupled plasma-optical emission spectroscopy (ICP-OES) on a PerkinElmer Optima 2100DV ICP-OES spectrometer.

### **ICP-OES measurement**

The sample of  $\text{Fe}_1\text{Ni}_2(\text{BDC-NH}_2)$ , where the feeding ratio of Fe to Ni is 1:2, was measured by ICP-OES, indicating the mole ratio of Fe to Ni in the sample is 1:2.45.

### **Electrochemical Test**

The electrochemical performance of catalytic electrodes was measured by electrochemical workstation (CHI660E, Shanghai Chenhua Instrument Co., Ltd.). The liner sweep voltammetry (LSV) was performed by sweeping the potential from 1.0 V to 1.8 V at a scan rate of  $5 \text{ mV} \cdot \text{s}^{-1}$ . Electrochemical impedance spectroscopy (EIS) was carried out at the polarization potential 1.53 V. The electrochemical double layer capacitance ( $C_{dl}$ ) was obtained by cyclic voltammetry (CV) in a region of non-Faradaic (0.2 V-0.3 V vs. Ag/AgCl) at different scan rates of 20, 40, 60, 80, 100, 120  $\text{mV} \cdot \text{s}^{-1}$ , respectively. The stability tests were proceeded from chronoamperometry (j-t) at a constant voltage of 0.49 V vs. Ag/AgCl for 12 hours and the comparison of LSV curves after 1000 CV cycles at a sweep rate of  $20 \text{ mV} \cdot \text{s}^{-1}$ .

### **RHE calibration**

We used the Ag/AgCl electrode as the reference electrode in all measurements. The potentials reported here were calibrated with respect to the reversible hydrogen electrode (RHE). The calibration was performed in  $\text{H}_2$ -saturated 1.0 mol/L KOH and Pt sheets were used as working and counter electrodes. CV curve was measured at scan rate of  $1 \text{ mV} \cdot \text{s}^{-1}$  and the average of two potentials at 0 mA current was taken to be the thermodynamic potential for the hydrogen electrode reactions.

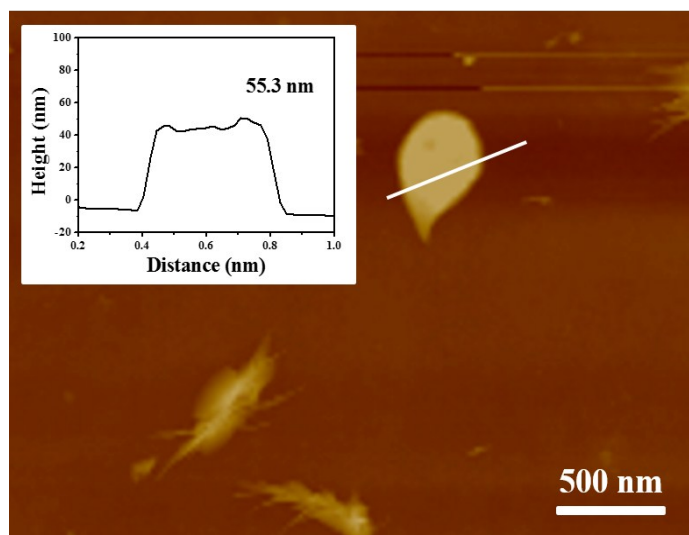

**Fig. S1** AFM image of as-prepared Fe<sub>1</sub>Ni<sub>2</sub>(BDC-NH<sub>2</sub>) ICP nanosheets.

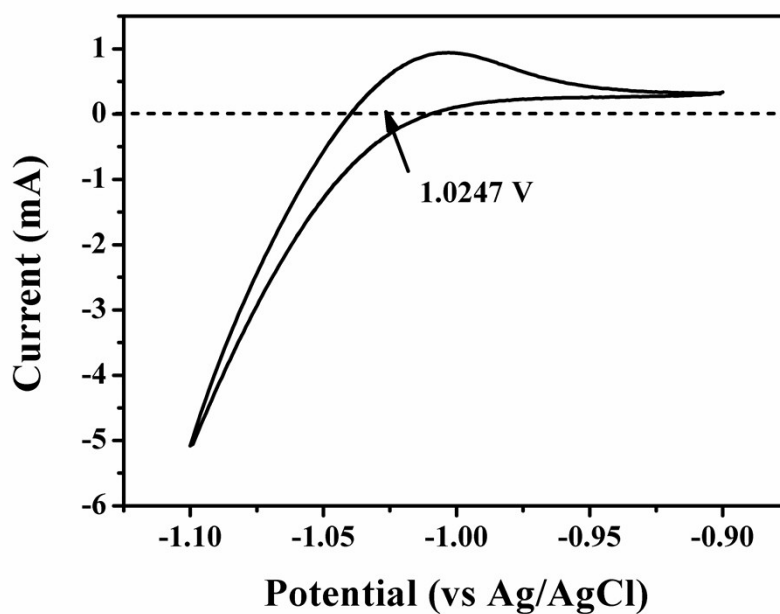

**Fig. S2** CV curve of hydrogen electrode reaction.

So the 1 M KOH,  $E(\text{RHE}) = E(\text{Ag/AgCl}) + 1.0247\text{V}$ .

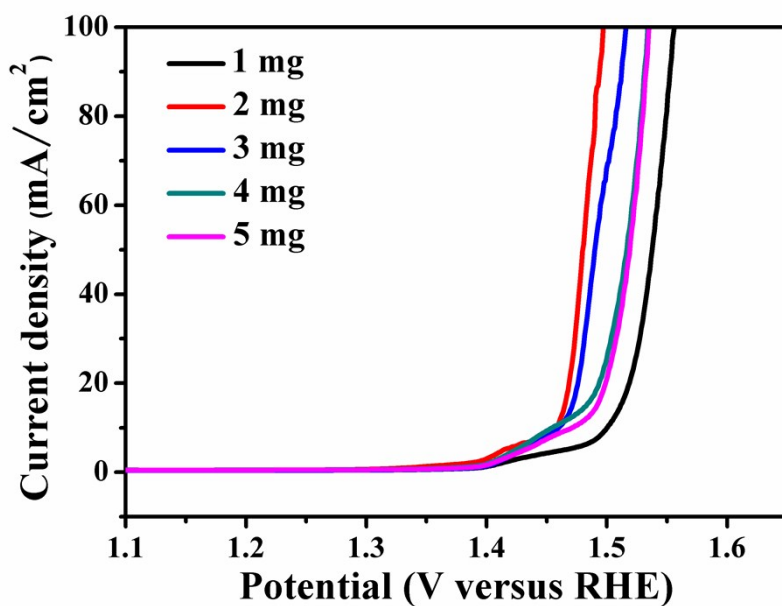

Fig. S3 LSV curves of Fe<sub>1</sub>Ni<sub>2</sub>(BDC-NH<sub>2</sub>)/NF with different loading amounts.

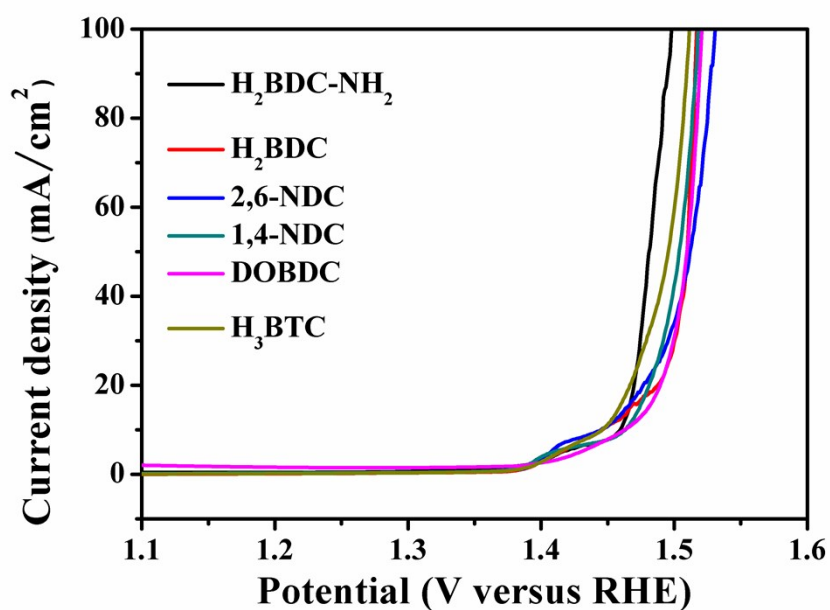

Fig. S4 LSV curves of Fe<sub>1</sub>Ni<sub>2</sub> bimetallic ICPs/NF electrodes with different ligands.

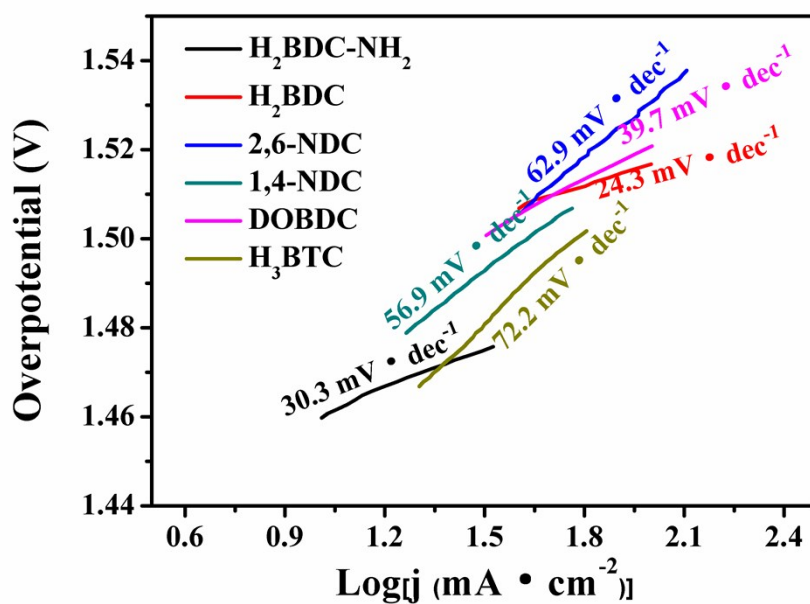

Fig. S5 Tafel plots of  $\text{Fe}_1\text{Ni}_2$  bimetallic ICP/NF electrodes with different ligands.

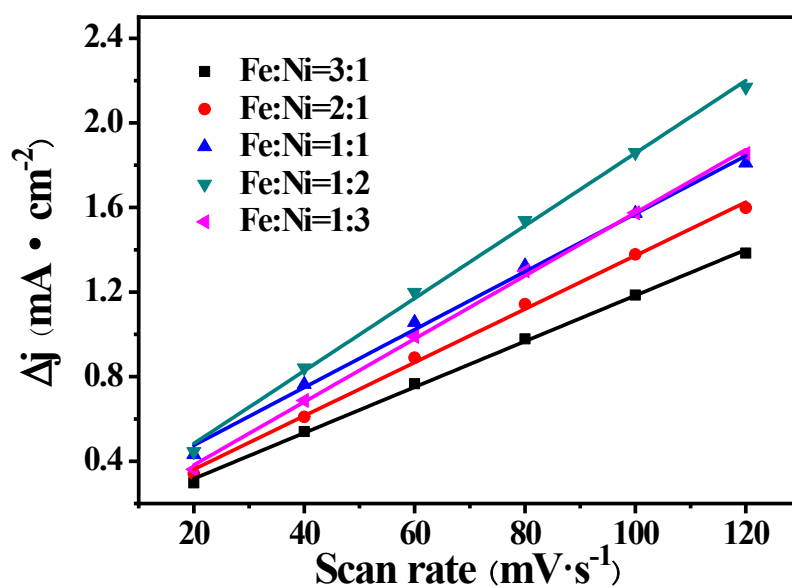

Fig. S6 The  $C_{dl}$  of  $\text{Fe}_x\text{Ni}_y(\text{BDC-NH}_2)/\text{NF}$  with different ratios of Fe and Ni.

The  $C_{dl}$  value of the  $\text{Fe}_x\text{Ni}_y(\text{BDC-NH}_2)/\text{NF}$  with 1:2 ratio is confirmed to be  $17.16 \text{ mF} \cdot \text{cm}^{-2}$ , which is higher than the other electrodes with ratios of 3:1 ( $10.83 \text{ mF} \cdot \text{cm}^{-2}$ ),

2:1 ( $12.63 \text{ mF}\cdot\text{cm}^{-2}$ ), 1:1 ( $13.69 \text{ mF}\cdot\text{cm}^{-2}$ ) and 1:3 ( $14.91 \text{ mF}\cdot\text{cm}^{-2}$ ).

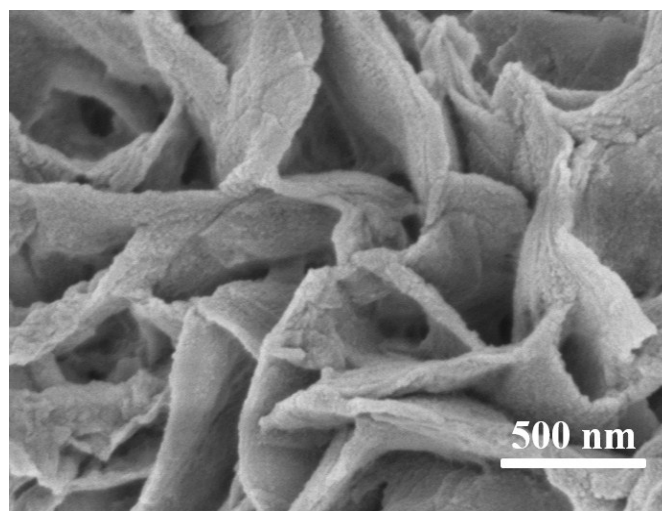

**Fig. S7** SEM image of Fe<sub>1</sub>Ni<sub>2</sub>(BDC-NH<sub>2</sub>)/NF after stability measurement of OER.

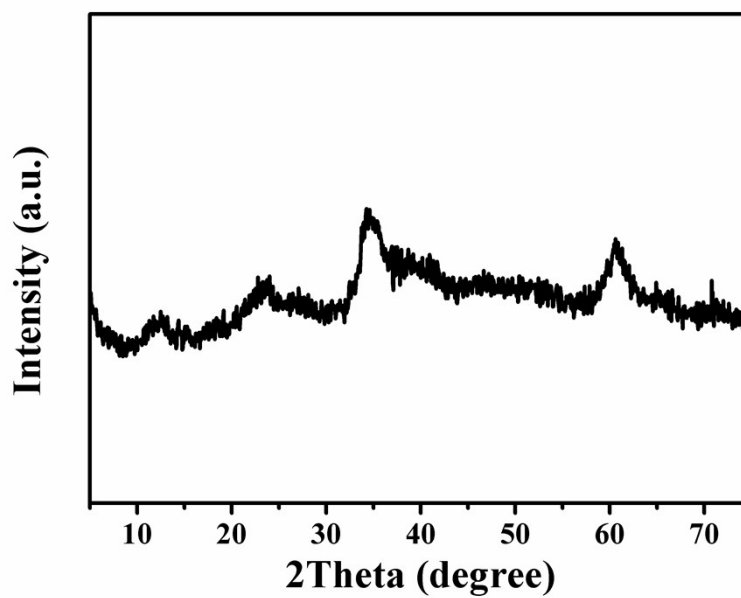

**Fig. S8** XRD pattern of Fe<sub>1</sub>Ni<sub>2</sub>(BDC-NH<sub>2</sub>) ICP after stability measurement of OER.



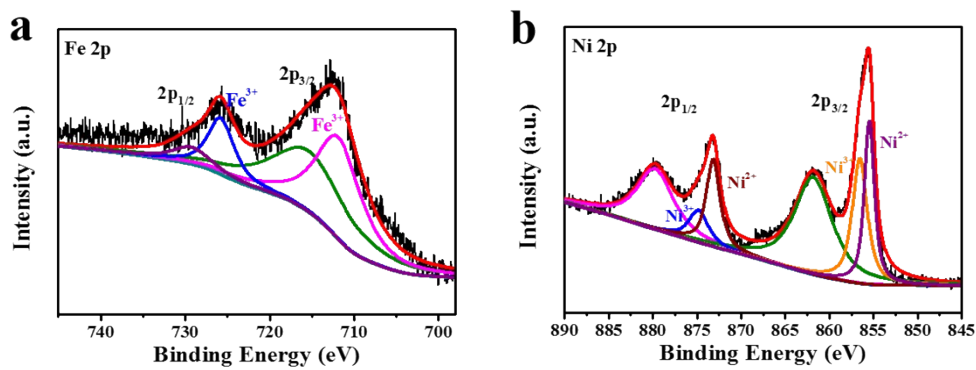

**Fig. S9** High-resolution XPS spectras of (a) Fe 2p and (b) Ni 2p of  $\text{Fe}_1\text{Ni}_2(\text{BDC-NH}_2)$  ICP after stability measurement of OER.

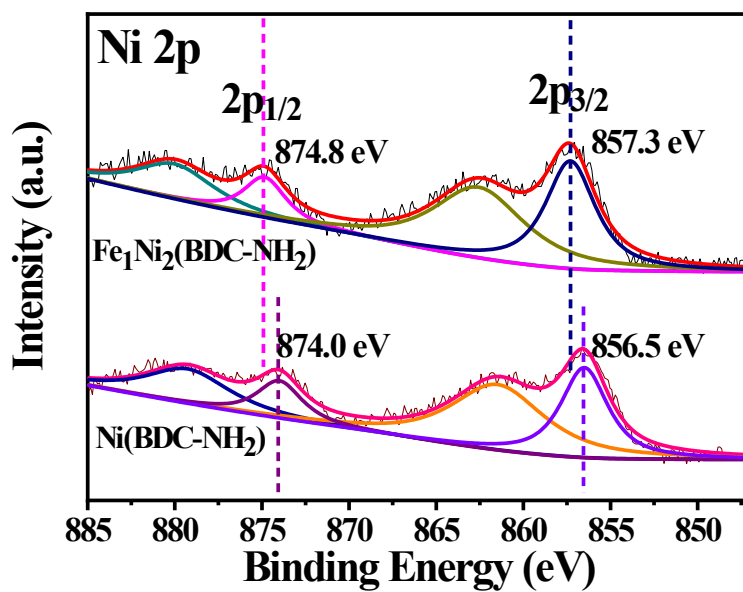

**Fig. S10** High-resolution Ni 2p XPS spectra of  $\text{Ni}(\text{BDC-NH}_2)$  and  $\text{Fe}_1\text{Ni}_2(\text{BDC-NH}_2)$ .

**Table S1** The OER catalytic performances comparison of the recently reported catalysts.

| Catalyst                                               | Overpotential (mV)           | Tafel slope (mV dec <sup>-1</sup> ) | Electrolyte | Reference |
|--------------------------------------------------------|------------------------------|-------------------------------------|-------------|-----------|
| Fe <sub>1</sub> Ni <sub>2</sub> (BDC-NH <sub>2</sub> ) | 228 @ 10 mA·cm <sup>-2</sup> | 30.3                                | 1 M KOH     | This work |
| CoSe <sub>2</sub> @DG composite                        | 270 @ 10 mA·cm <sup>-2</sup> | 64                                  | 0.1 M KOH   | 1         |
| o-CoSe <sub>2</sub> -O UNs                             | 251 @ 10 mA·cm <sup>-2</sup> | 73                                  | 1 M KOH     | 2         |
| MIL-53(FeNi)/NF                                        | 233 @ 50 mA·cm <sup>-2</sup> | 31.3                                | 1 M KOH     | 3         |
| FeNi-O nanosheets                                      | 213 @ 10 mA·cm <sup>-2</sup> | 32                                  | 1 M KOH     | 4         |
| FeNi <sub>4.34</sub> @FeNi-foil                        | 283 @ 10 mA·cm <sup>-2</sup> | 53                                  | 1 M KOH     | 5         |
| Ni-MOF@Fe-MOF                                          | 265 @ 10 mA·cm <sup>-2</sup> | 82                                  | 1 M KOH     | 6         |
| Fe <sub>1</sub> Co <sub>3</sub> /V <sub>O</sub> -800   | 260 @ 10 mA·cm <sup>-2</sup> | 53                                  | 1 M KOH     | 7         |
| MIL-100(FeNi)/NF                                       | 243 @ 10 mA·cm <sup>-2</sup> | 30.4                                | 1 M KOH     | 8         |
| NiFe-MOF-74                                            | 223 @ 10 mA·cm <sup>-2</sup> | 71.6                                | 1 M KOH     | 9         |
| NiFe-MOF                                               | 240 @ 10 mA·cm <sup>-2</sup> | 34                                  | 0.1 M KOH   | 10        |

### References:

1. X. Wang, L. Zhuang, T. He, Y. Jia, L. Zhang, X. Yan, M. Gao, A. Du, Z. Zhu, X. Yao and S. H. Yu, *iScience*, 2018, **7**, 145-153.
2. X. Wang, L. Z. Zhuang, Y. Jia, H. L. Liu, X. C. Yan, L. Z. Zhang, D. J. Yang, Z. H. Zhu and X. D. Yao, *Angew. Chem. Int. Ed.*, 2018, **57**, 16421-16425.
3. F. Z. Sun, G. Wang, Y. Q. Ding, C. Wang, B. B. Yuan and Y. Q. Lin, *Adv. Energy Mater.*, 2018, **8**, 11.
4. X. Long, Z. J. Ma, H. Yu, X. Y. Gao, X. Y. Pan, X. X. Chen, S. H. Yang and Z. G. Yi, *J. Mater. Chem. A*, 2016, **4**, 14939-14943.
5. U. Y. Qazi, C. Z. Yuan, N. Ullah, Y. F. Jiang, M. Imran, A. Zeb, S. J. Zhao, R. Javaid and A. W. Xu, *ACS Appl. Mater. Interfaces*, 2017, **9**, 28627-28634.
6. K. Rui, G. Zhao, Y. Chen, Y. Lin, Q. Zhou, J. Chen, J. Zhu, W. Sun, W. Huang and S. X. Dou, *Adv. Funct. Mater.*, 2018, **28**, 1801554.
7. W. X. Chen, Y. W. Zhang, G. L. Chen, R. Huang, Y. M. Zhou, Y. J. Wu, Y. J. Hu and K. Ostrikov, *J. Mater. Chem. A*, 2019, **7**, 3090-3100.
8. C. Q. Li, Y. W. Liu, G. Wang, L. H. Guan and Y. Q. Lin, *ACS Sustainable Chem. Eng.*, 2019, **7**, 7496-7501.
9. J. L. Xing, K. L. Guo, Z. H. Zou, M. M. Cai, J. Du and C. L. Xu, *Chem. Commun.*, 2018, **54**, 7046-7049.
10. J. Duan, S. Chen and C. Zhao, *Nat Commun*, 2017, **8**, 15341.
